# Supplementary material for: Expression mode and prognostic value of FXYD family members in colon cancer
Source: publisher site journal article supplement (doi:10.18632/aging.203290), 2021-07-15
Supplement: Supplementary file [file aging-v13i14-203290-supplementary-material-SD1.pdf]

## SUPPLEMENTARY TABLES

**Supplementary Table 1. The correlation of FXYD1 expression with clinicopathologic characteristics of CC patients.**

| Variable |          | Cases (n) | High | Low | P value |
|----------|----------|-----------|------|-----|---------|
|          |          | 455       | 129  | 326 |         |
| Age      | ≥60      | 332       | 91   | 241 | 0.483   |
|          | <60      | 123       | 38   | 85  |         |
| Gender   | Male     | 241       | 67   | 174 | 0.835   |
|          | Female   | 214       | 62   | 152 |         |
| T stage  | T1/T2    | 88        | 18   | 70  | 0.086   |
|          | T3/T4    | 367       | 111  | 256 |         |
| N stage  | Negative | 267       | 59   | 208 | <0.001* |
|          | Positive | 188       | 70   | 118 |         |
| M stage  | Negative | 339       | 89   | 250 | 0.096   |
|          | Positive | 116       | 40   | 76  |         |

\*,  $P < 0.05$ .

**Supplementary Table 2. The correlation of FXYD2 expression with clinicopathologic characteristics of CC patients.**

| Variable |          | Cases (n) | High | Low | P value |
|----------|----------|-----------|------|-----|---------|
|          |          | 455       | 409  | 46  |         |
| Age      | ≥60      | 332       | 296  | 36  | 0.485   |
|          | <60      | 123       | 113  | 10  |         |
| Gender   | Male     | 241       | 212  | 29  | 0.163   |
|          | Female   | 214       | 197  | 17  |         |
| T stage  | T1/T2    | 88        | 71   | 17  | 0.003*  |
|          | T3/T4    | 367       | 338  | 29  |         |
| N stage  | Negative | 267       | 236  | 31  | 0.269   |
|          | Positive | 188       | 173  | 15  |         |
| M stage  | Negative | 339       | 303  | 36  | 0.597   |
|          | Positive | 116       | 106  | 10  |         |

\*,  $P < 0.05$ .

**Supplementary Table 3. The correlation of FXYD3 expression with clinicopathologic characteristics of CC patients.**

| Variable |          | Cases (n) | High | Low | P value |
|----------|----------|-----------|------|-----|---------|
|          |          | 455       | 323  | 132 |         |
| Age      | ≥60      | 332       | 235  | 97  | 0.908   |
|          | <60      | 123       | 88   | 35  |         |
| Gender   | Male     | 241       | 169  | 72  | 0.680   |
|          | Female   | 214       | 154  | 60  |         |
| T stage  | T1/T2    | 88        | 66   | 22  | 0.433   |
|          | T3/T4    | 367       | 257  | 110 |         |
| N stage  | Negative | 267       | 201  | 66  | 0.021*  |
|          | Positive | 188       | 122  | 66  |         |
| M stage  | Negative | 339       | 250  | 89  | 0.033*  |
|          | Positive | 116       | 73   | 43  |         |

\*,  $P < 0.05$ .

**Supplementary Table 4. The correlation of FXYD4 expression with clinicopathologic characteristics of CC patients.**

| Variable |          | Cases (n) | High | Low | P value |
|----------|----------|-----------|------|-----|---------|
|          |          | 455       | 153  | 302 |         |
| Age      | ≥60      | 332       | 114  | 218 | 0.655   |
|          | <60      | 123       | 39   | 84  |         |
| Gender   | Male     | 241       | 93   | 148 | 0.022*  |
|          | Female   | 214       | 60   | 154 |         |
| T stage  | T1/T2    | 88        | 29   | 59  | 1.000   |
|          | T3/T4    | 367       | 124  | 243 |         |
| N stage  | Negative | 267       | 90   | 177 | 1.000   |
|          | Positive | 188       | 63   | 125 |         |
| M stage  | Negative | 339       | 113  | 226 | 0.821   |
|          | Positive | 116       | 40   | 76  |         |

\*,  $P < 0.05$ .

**Supplementary Table 5. The correlation of FXYD5 expression with clinicopathologic characteristics of CC patients.**

| Variable |          | Cases (n) | High | Low | P value |
|----------|----------|-----------|------|-----|---------|
|          |          | 455       | 171  | 284 |         |
| Age      | ≥60      | 332       | 132  | 200 | 0.128   |
|          | <60      | 123       | 39   | 84  |         |
| Gender   | Male     | 241       | 93   | 148 | 0.698   |
|          | Female   | 214       | 78   | 136 |         |
| T stage  | T1/T2    | 88        | 24   | 64  | 0.028*  |
|          | T3/T4    | 367       | 147  | 220 |         |
| N stage  | Negative | 267       | 92   | 175 | 0.116   |
|          | Positive | 188       | 79   | 109 |         |
| M stage  | Negative | 339       | 124  | 215 | 0.505   |
|          | Positive | 116       | 47   | 69  |         |

\*,  $P < 0.05$ .

**Supplementary Table 6. The correlation of FXYD6 expression with clinicopathologic characteristics of CC patients.**

| Variable |          | Cases (n) | High | Low | P value |
|----------|----------|-----------|------|-----|---------|
|          |          | 455       | 183  | 272 |         |
| Age      | ≥60      | 332       | 123  | 209 | 0.031*  |
|          | <60      | 123       | 60   | 63  |         |
| Gender   | Male     | 241       | 93   | 148 | 0.503   |
|          | Female   | 214       | 90   | 124 |         |
| T stage  | T1/T2    | 88        | 28   | 60  | 0.090   |
|          | T3/T4    | 367       | 155  | 212 |         |
| N stage  | Negative | 267       | 90   | 177 | 0.001*  |
|          | Positive | 188       | 93   | 95  |         |
| M stage  | Negative | 339       | 131  | 208 | 0.273   |
|          | Positive | 116       | 52   | 64  |         |

\*,  $P < 0.05$ .

**Supplementary Table 7. The correlation of FXD7 expression with clinicopathologic characteristics of CC patients.**

| Variable |          | Cases (n) | High | Low | P value |
|----------|----------|-----------|------|-----|---------|
|          |          | 455       | 158  | 297 |         |
| Age      | ≥60      | 332       | 113  | 219 | 0.658   |
|          | <60      | 123       | 45   | 78  |         |
| Gender   | Male     | 241       | 92   | 149 | 0.115   |
|          | Female   | 214       | 66   | 148 |         |
| T stage  | T1/T2    | 88        | 29   | 59  | 0.803   |
|          | T3/T4    | 367       | 129  | 238 |         |
| N stage  | Negative | 267       | 84   | 183 | 0.090   |
|          | Positive | 188       | 74   | 114 |         |
| M stage  | Negative | 339       | 117  | 222 | 0.910   |
|          | Positive | 116       | 41   | 75  |         |
